# Supplementary material for: The Distinctive Serum Metabolomes of Gastric, Esophageal and Colorectal Cancers
Source: PubMed Central journal article supplement (PMC7916516; doi:10.3390/cancers13040720), 2021-02-10
Supplement: cancers-13-00720-s001.pdf [file cancers-13-00720-s001.pdf]

# The distinctive serum metabolomes of gastric, esophageal and colorectal cancers

## Supplementary File

**Table S1.** Differential metabolites (EC vs.non-EC) for esophageal cancer

| Metabolite [48]       | Metabolite [49]       | Metabolite [50]       | Metabolite *      |
|-----------------------|-----------------------|-----------------------|-------------------|
| Glucose↓              |                       |                       |                   |
| Pyruvic acid↑         |                       |                       |                   |
| Lactate↑              |                       |                       |                   |
| Citrate↑              |                       |                       |                   |
| A-ketoglutaric acid ↑ |                       |                       |                   |
| Succinate↓            |                       |                       |                   |
| Fumarate↑             |                       |                       |                   |
| Malate↑               |                       |                       |                   |
| Valine↓               |                       |                       |                   |
| Histidine↑            |                       | Histidine↓            |                   |
| Phenylalanine↓        |                       |                       |                   |
| Threonine↓            |                       |                       |                   |
| Leucine↓              |                       |                       |                   |
| Methionine↓           |                       | Methionine↓           |                   |
| Tryptophan↓           | Tryptophan↓           | Tryptophan↓           | Tryptophan↓       |
| Glutamine↑            |                       |                       |                   |
| Glutamate↓            |                       |                       |                   |
| Serine↓               |                       |                       |                   |
| Glycine↓              |                       |                       |                   |
| Alanine↓              |                       | Alanine↓              |                   |
| Arginine↓             |                       |                       |                   |
| Aspartate↑            |                       |                       |                   |
| Cystine↑              |                       |                       |                   |
| Proline↓              |                       | Proline↓              |                   |
| Isoleucine↓           |                       |                       |                   |
| Lysine↑               |                       |                       |                   |
| Tyrosine↑             | Tyrosine↓             | Tyrosine↓             | Tyrosine↓         |
| Linoleic acid↓        | Linoleic acid         |                       | Linoleic acid↑    |
| Oleic acid↑           |                       | Oleic acid↑           | Oleic acid↑       |
|                       | Palmitoleic acid↑     | Palmitoleic acid↑     | Palmitoleic acid↑ |
|                       | Choline↓              |                       |                   |
| Hypoxanthine↑         | Hypoxanthine↓         |                       |                   |
|                       | Proline betaine↓      |                       |                   |
|                       | Indoleacrylic acid ↓  |                       |                   |
|                       | Isovaleryl-carnitine↓ | Isovaleryl-carnitine↓ |                   |
|                       | Inosine ↓             |                       |                   |

---

|                 |                           |                              |
|-----------------|---------------------------|------------------------------|
|                 | Alpha-Linolenic acid ↑    |                              |
|                 | Piperine ↓                | Piperine ↓                   |
|                 | L-Octanoyl-carnitine ↓    |                              |
|                 | Nonanoyl-carnitine ↓      |                              |
|                 | Decadienoyl-carnitine ↓   |                              |
|                 | Decanoylcarnitine ↓       |                              |
|                 | Docosahexaenoic acid ↓    |                              |
|                 | Undecanoyl-carnitine ↓    |                              |
|                 | Dodecenoyl-carnitine ↓    |                              |
|                 | Phenylalanyl-Tryptophan ↓ |                              |
|                 | Tetracosahexaenoic acid ↓ |                              |
|                 | Cortisol ↓                | Cortisol ↑                   |
|                 | Tetradecadien-carnitine ↓ |                              |
| Asparagine ↓    |                           | 3-hydroxy-butyrate ↑         |
|                 |                           | Asparagine ↓                 |
|                 |                           | Glycochenodeoxycholate ↓     |
|                 |                           | Glycocholate ↓               |
|                 |                           | Glycodeoxycholate ↓          |
|                 |                           | Hippurate ↓                  |
|                 |                           | Mannose ↑                    |
|                 |                           | Propionylcarnitine ↓         |
| Pyroglutamine ↓ |                           | Pyroglutamine ↑              |
|                 |                           | Threitol ↓                   |
|                 |                           | 10-heptadecenoate (17:1n7) ↑ |
|                 | Ribose ↓                  |                              |
|                 | Taurine ↑                 |                              |
|                 | Cis-Aconitic acid ↑       |                              |
|                 | Hydroxyproline ↓          |                              |
|                 | Ornithine ↓               |                              |
|                 | Kynurenic acid ↓          |                              |
|                 | Creatinine ↓              |                              |
|                 | Urea ↓                    |                              |
|                 | Urate ↓                   |                              |
|                 | Monostearin ↓             |                              |
|                 | Pipecolic acid ↓          |                              |

---

---

Glyceric acid↓

10-nonadecanoate(19:1n9)↑  
1-linoleoylglycerophosphocholine↓  
1-linoleoylglycerophosphoethanolamine↓  
1-myristoylglycerophosphocholine↓  
1-oleoylglycerophosphoethanolamine↓  
1-palmitoylglycerophosphoethanolamine↓  
1-stearoylglycerophosphoethanolamine↓  
2-hydroxydecanoic acid↓  
2-methylbutyrylcarnitine (C5)↓  
3-hydroxypropanoate↓  
3-methyl-2-oxobutyrate↑  
5-dodecenoate (12:1n7)↑  
adrenate (22:4n6)↑  
beta-alanine↓  
catechol sulfate↓  
creatine↓  
deoxycarnitine↓  
dihomo-linoleate (20:2n6)↑  
docosadienoate (22:2n6)↑  
docosapentaenoate (n3 DPA; 22:5n3)↑  
docosapentaenoate (n6 DPA; 22:5n6)↑  
eicosenoate (20:1n9 or 11)↑  
ergothioneine↓  
gamma-glutamylmethionine↓  
gamma-glutamylphenylalanine↓  
gamma-glutamyltyrosine↓  
hexadecanedioate↑  
indolelactate↓  
indolepropionate↓  
margarate (17:0)↑

---

---

myristate (14:0)↑  
myristoleate (14:1n5)↑  
N6-acetyllysine↓  
O-methylcatechol sulfate↓  
palmitate (16:0)↑  
paraxanthine↓  
pentadecanoate (15:0)↑  
propionylcarnitine↓  
ribulose↓  
scyllo-inositol↓  
stachydrine↓  
stearate (18:0)↑  
xylonate↓

Dodecanoic acid↓  
Palmitic acid↑  
LPA(18:1/0:0)↓  
LysoPC(14:0/0:0)↓  
LysoPC(18:2)↑  
LysoPC(24:0)↑  
LysoPC(18:4)↑  
PC(14:1/P-18:1)↑  
PC(16:0/18:2)↓  
PC(24:1/22:6)↑

---

The arrows indicate reported increasing or decreasing trends relative to non-GC controls.

**Table S2.** Differential metabolites (CRC *vs.* non-CRC) for colorectal cancer.

| Metabolite<br>[44] N=24 | Metabolite<br>[51]         | Metabolite<br>[52] | Metabolite<br>[55] | Metabolite<br>[53]         | Metabolite<br>[54]          |
|-------------------------|----------------------------|--------------------|--------------------|----------------------------|-----------------------------|
| Glutamic acid           |                            |                    | Glutamic acid↓     | Glutamic acid              | Glutamic acid↓              |
| Phenylalanine           |                            | Phenylalanine      |                    | Phenylalanine              | Phenylalanine↓              |
| Alanine                 | Alanine                    | Alanine            |                    | Alanine                    | Alanine                     |
| Isoleucine              | Isoleucine                 | Isoleucine         |                    |                            | Isoleucine↑                 |
| Histidine               |                            |                    |                    | Histidine                  |                             |
| Serine                  |                            |                    |                    |                            | Serine↓                     |
| Lactic acid             | Lactic acid                | Lactic acid        | Lactic acid↓       |                            | Lactic acid↑                |
| Aspartic acid           |                            |                    | Aspartic acid↓     |                            |                             |
| Succinate               |                            |                    |                    | Succinate                  |                             |
| Cysteine                |                            | Cysteine           |                    | Cysteine                   | Cysteine↓                   |
| Glutamine               |                            |                    |                    | Glutamine                  |                             |
| Leucine                 |                            |                    |                    | Leucine                    | Leucine↓                    |
| Valine                  |                            |                    |                    | Valine                     | Valine↓                     |
| Choline                 |                            |                    | Choline↓           | Choline                    |                             |
| Fumaric acid            |                            |                    | Fumaric acid       |                            | Fumaric acid↑               |
| Tyrosine                |                            | Tyrosine           |                    | Tyrosine                   | Tyrosine↓                   |
| Asparagine              |                            |                    |                    | Asparagine                 |                             |
| Pyruvic acid            |                            |                    | Pyruvic acid↑      |                            | Pyruvic acid↑               |
| Arginine                |                            |                    |                    | Arginine                   |                             |
| Methionine              |                            |                    |                    | Methionine                 |                             |
| Tryptophan              | Tryptophan                 |                    |                    | Tryptophan                 | Tryptophan↓                 |
| Acetoacetate            |                            |                    |                    |                            |                             |
| Uracil                  |                            |                    |                    |                            |                             |
| Urea                    | Urea                       |                    |                    |                            | Urea↓                       |
| Creatinine              |                            |                    |                    |                            | Creatinine↑                 |
| Homovanillate           |                            |                    |                    | Homovanillate              |                             |
| Guanidoacetate          |                            |                    |                    |                            |                             |
| e                       |                            |                    |                    |                            |                             |
| Putrescine              |                            |                    |                    |                            |                             |
|                         | 2,3-<br>Butanediol         |                    |                    |                            |                             |
|                         | 2-Amino-<br>butanoic acid  |                    |                    | 2-Amino-<br>butanoic acid  |                             |
|                         | 2-Hydroxy-<br>butyric acid |                    |                    | 2-Hydroxy-<br>butyric acid | 2-Hydroxy-<br>butyric acid↑ |
|                         | 3-Hydroxy-<br>butyric acid |                    |                    | 3-Hydroxy-<br>butyric acid | 3-hydroxy-<br>butyric acid↑ |
|                         | 3-Hydroxy-<br>pyridine     |                    |                    |                            |                             |
|                         | Butanoic<br>acid           | Butanoic acid      |                    |                            |                             |
|                         | D-Fructose                 | Fructose           |                    |                            | Fructose↑                   |
|                         | D-Glucose                  |                    | Glucose↑           |                            | Glucose↓                    |
|                         | D-Mannose                  |                    | Mannose↑           |                            |                             |

|           |                         |                               |                               |
|-----------|-------------------------|-------------------------------|-------------------------------|
| Glycine   | Glycine                 |                               | Glycine↓                      |
| Proline   |                         |                               | Proline↑                      |
| Uric acid |                         | Uric acid                     | Uric acid↓                    |
|           | Ethylene glycol         |                               |                               |
|           | Stearic acid            |                               |                               |
|           | Citric acid             |                               | Citric acid↑                  |
|           | Lysine                  | Lysine                        | Lysine↓                       |
|           | Inositol                |                               | Inositol↑                     |
|           | Glyceric acid           | Glyceric acid↓                |                               |
|           | Palmitic acid           |                               |                               |
|           | Linoleic acid           | Linoleic acid↑                |                               |
|           | 2-Monostearoyl-glycerol | 2-Monostearoyl-glycerol↓      |                               |
|           | Threonine               |                               | Threonine↓                    |
|           | Glycerol-3-phosphate    |                               |                               |
|           | Glyceryl palmitate      | Glyceryl palmitate            |                               |
|           | Hexadecanoic acid       |                               |                               |
|           | D-Ribose 5-phosphate    |                               | D-Ribose 5-phosphate          |
|           | Glycerol                |                               | Glycerol                      |
|           | Nonane                  |                               |                               |
|           | Malonic acid            | Malonic acid↓                 |                               |
|           | Arabinose               |                               | Arabinose↑                    |
|           | Threonic acid           |                               |                               |
|           |                         | Hypoxanthine↓                 | Threonic acid                 |
|           |                         | Xanthine↓                     | Hypoxanthine                  |
|           |                         | Tryptophyl-glutamate↓         |                               |
|           |                         | 3-methyl-2-oxobutyrate↑       |                               |
|           |                         | 5-oxoproline↓                 |                               |
|           |                         | Pseudouridine↑                |                               |
|           |                         | Hydroxyisovaleroyl carnitine↓ | Hydroxyisovaleroyl carnitine↓ |
|           |                         | Kynurenine↑                   | Kynurenine                    |
|           |                         | cis-4-decenoyl carnitine↑     |                               |
|           |                         | Decanoyl-carnitine↑           |                               |
|           |                         | γ-glutamylalanine↑            |                               |

---

|                                       |                           |                |
|---------------------------------------|---------------------------|----------------|
| Heptanoate (7:0)↓                     | Heptanoate (7:0)↓         |                |
| Aspartylleucine↓                      |                           |                |
| 1-stearoylglycerophosphoethanolamine↓ |                           |                |
| Theobromine↓                          |                           |                |
| 1-palmitoylplasmenylethanolamine↓     |                           |                |
| 2-hydroxypalmitate↑                   |                           |                |
| Phenylalanylglutamate↓                |                           |                |
| Leucylalanine↑                        |                           |                |
| 1-oleoylglycerophosphocholine↓        |                           |                |
| cysteine-glutathione disulfide↑       |                           |                |
| Paraxanthine↓                         |                           |                |
| N-acetylglycine↑                      |                           |                |
| Phenylalanylserine↑                   |                           |                |
| glycolate ↓                           |                           | Glycolate↑     |
| Octanoylcarnitine↑                    |                           |                |
| Sucrose↑                              |                           | Sucrose↑       |
| 2-hydroxystearate↑                    |                           |                |
| Theophylline↓                         |                           |                |
| Ornithine↓                            | Ornithine                 | Ornithine↑     |
| 3-dehydrocarnitine↓                   |                           |                |
| Benzoate↓                             | Benzoate                  |                |
| Linolenate ↑                          |                           |                |
| Uridine↓                              |                           |                |
| Isovalerate↓                          | Isovalerate               | Isovalerate↓   |
|                                       | Octanoic acid             | Octanoic acid↑ |
|                                       | Decanoic acid             |                |
|                                       | Gluconolactone            |                |
|                                       | Gluconic acid             |                |
|                                       | 5-Amino-4-oxovaleric acid |                |
|                                       | Inosine                   |                |
|                                       | 1-Methylnicotinamide      |                |
|                                       | Myristoleic acid          |                |
|                                       | Stachydrine               |                |
|                                       | Isobutyrylcarnitine       |                |

---

---

|                                |                           |
|--------------------------------|---------------------------|
| Hydroxyproline                 | hydroxyproline            |
| e                              | ↑                         |
| 3-Methyl-histidine             |                           |
| Perillic acid                  |                           |
| 2-oxovaleric acid              |                           |
| Ethylglutamine                 |                           |
| Trimethylamine N-oxide         |                           |
| S-Methyl-cysteine              |                           |
| Cholic acid                    |                           |
| Ethanolamine phosphate         |                           |
| Cysteine glutathione disulfide |                           |
| Quinic acid                    |                           |
| Indole-3-acetic acid           |                           |
| Sarcosine                      | Sarcosine↓                |
| B-alanine                      |                           |
| Isobutyric acid                |                           |
| Betaine                        |                           |
| Lauric acid                    |                           |
| Ethanolamine                   |                           |
| Citrulline                     |                           |
|                                | 2-aminoisobutyric acid↓   |
|                                | 2-amino-butyric acid↓     |
|                                | 3-hydroxyisovaleric acid↓ |
|                                | Phosphoric acid↑          |
|                                | Nonanoic acid↓            |
|                                | Threitol↑                 |
|                                | meso-erythritol↑          |
|                                | 2-ketoglutaric acid↑      |
|                                | Xylose↑                   |
|                                | Arabitol↑                 |
|                                | Isocitric acid↑           |
|                                | 2-aminopimelic acid↑      |

---



---

1,5-anhydro-  
glucitol↓  
Sorbitol↑  
5-  
dehydroquinic  
acid↓  
Hippuric acid↓  
Galactose↓  
Glucosamine↓  
Glucuronic  
acid↑  
Ascorbic acid↓  
Palmitoleic  
acid↓  
Elaidic acid↓  
Maltose↑  
Malic acid↑

---

The arrows indicate reported increasing or decreasing trends relative to non-GC controls.
